# Supplementary material
Source: PubMed Central journal article supplement (PMC4787837)
Supplement: zhoy768663.ww3_default.pdf [file zhoy768663.ww3_default.pdf]

### Appendix 3: additional tables [posted as supplied by author]

Table A The Difference in Baseline Characteristics of the Subjects Who had not been Allocated Intervention between Two Communities.

|                                                    | Intervention community | Control community | <i>P</i> |
|----------------------------------------------------|------------------------|-------------------|----------|
| Subjects (n)                                       | 87                     | 103               |          |
| Male                                               | 44(50.6%)              | 50(48.5%)         | 0.7803   |
| Age (yrs)                                          |                        |                   | 0.7428   |
| < 60 yrs                                           | 46(52.9%)              | 52(50.5%)         |          |
| ≥ 60 yrs                                           | 41(47.1%)              | 51(49.5%)         |          |
| Education (yrs) *                                  |                        |                   | 0.9336   |
| <10 yrs                                            | 54(68.4%)              | 71(68.9%)         |          |
| ≥10 yrs                                            | 25(31.6%)              | 32(31.1%)         |          |
| Smoking status at baseline†                        |                        |                   | 0.1873   |
| Never smoker                                       | 59(73.8%)              | 59(62.8%)         |          |
| Current smoker                                     | 18(22.5%)              | 26(27.7%)         |          |
| Smoking cessation                                  | 3(3.8%)                | 9(9.6%)           |          |
| Having previous diagnosis of respiratory disorders | 14(16.1%)              | 14(13.6%)         | 0.6282   |
| Having respiratory symptoms                        | 31(35.6%)              | 34(33.0%)         | 0.7042   |

\* 8 subjects' data in intervention community (IC) was missing.

† 16 subjects' data was missing (7subjects in IC and 9 subjects in control community (CC)).

**Table B** The Adjusted Difference between Two Communities in Annual Rate of Decline in FEV<sub>1</sub> and FEV<sub>1</sub>/FVC (age ≥ 40 yrs)

|                             | Intervention community |            | Control community |           | Difference between two communities with adjustment* |        |
|-----------------------------|------------------------|------------|-------------------|-----------|-----------------------------------------------------|--------|
|                             | n                      | Mean(SE)   | n                 | Mean(SE)  | Mean(95% CI)                                        | P      |
| <b>Healthy population</b>   |                        |            |                   |           |                                                     |        |
| FEV <sub>1</sub> (ml/yr)    | 103                    | 17 (4)     | 91                | 42 (5)    | 5(29 to 39)                                         | 0.7612 |
| FEV <sub>1</sub> (pred%/yr) | 103                    | -0.4(0.2)  | 91                | 0.9(0.2)  | 0.1(-1.6 to1.9)                                     | 0.8795 |
| FEV <sub>1</sub> /FVC(%/yr) | 103                    | -0.7(0.2)  | 91                | 0.2(0.2)  | 0.4(-0.8 to 1.7)                                    | 0.4879 |
| <b>High-risk population</b> |                        |            |                   |           |                                                     |        |
| FEV <sub>1</sub> (ml/yr)    | 279                    | 29 (4)     | 288               | 52 (4)    | 22(1to 42 )                                         | 0.0375 |
| FEV <sub>1</sub> (pred%/yr) | 279                    | 0.2(0.2)   | 288               | 1.3(0.2)  | 1.3(0.2 to 2.4)                                     | 0.0206 |
| FEV <sub>1</sub> /FVC(%/yr) | 279                    | -0.4(0.1)  | 288               | 0.5(0.1)  | 0.7(0.1 to 1.4)                                     | 0.0344 |
| <b>COPD population</b>      |                        |            |                   |           |                                                     |        |
| FEV <sub>1</sub> (ml/yr)    | 47                     | 62 (13)    | 52                | 47 (13)   | 7(-61 to76)                                         | 0.8369 |
| FEV <sub>1</sub> (pred%/yr) | 47                     | 2.4 (0.7)  | 52                | 1.5 (0.7) | 0.0(-3.3 to 3.3)                                    | 0.9874 |
| FEV <sub>1</sub> /FVC(%/yr) | 47                     | -0.6 (0.4) | 52                | 0.2 (0.4) | 0.5(-1.6 to2.6)                                     | 0.6415 |

\* Difference after adjustment for confounding (i.e. baseline FEV<sub>1</sub> (or FEV<sub>1</sub>/FVC), age, gender, education, smoking status, COPD, body mass index, and occupational exposure to dust/gases/fumes) and clustering effects.

**Table C** Annual Rate of Decline in FEV<sub>1</sub> (ml/yr, pred%/yr) and FEV<sub>1</sub>/FVC (%/yr) in Subjects (age ≥ 40 yrs) with Various Smoking Status by Communities Stratum

|                               | Never smokers |                     | Smoking cessation |                     | Current smokers |                     | Difference of FEV <sub>1</sub> between Various Smoking Status |                |                        |                |                        |                |
|-------------------------------|---------------|---------------------|-------------------|---------------------|-----------------|---------------------|---------------------------------------------------------------|----------------|------------------------|----------------|------------------------|----------------|
|                               | n             | M (SE) <sup>*</sup> | n                 | M (SE) <sup>*</sup> | n               | M (SE) <sup>†</sup> | Current vs. Never                                             |                | Current vs. Cessation  |                | Cessation vs. Never    |                |
|                               |               |                     |                   |                     |                 |                     | M (95% CI) <sup>‡</sup>                                       | P <sup>‡</sup> | M(95% CI) <sup>‡</sup> | P <sup>‡</sup> | M(95% CI) <sup>‡</sup> | P <sup>‡</sup> |
| <b>Intervention community</b> |               |                     |                   |                     |                 |                     |                                                               |                |                        |                |                        |                |
| FEV <sub>1</sub> (ml/yr)      | 239           | 14(4)               | 96                | 38(7)               | 94              | 66(7)               | 51(35to67)                                                    | <0.0001        | 27(8to46)              | 0.0008         | 24(9to40)              | 0.1852         |
| FEV <sub>1</sub> (pred%/yr)   | 239           | -0.5(0.2)           | 96                | 0.7(0.3)            | 94              | 2.0(0.3)            | 2.5(1.7to3.3)                                                 | <0.0001        | 1.3(0.3to2)            | 0.0054         | 1.3(0.5to2.0)          | 0.0241         |
| FEV <sub>1</sub> /FVC (%/yr)  | 239           | 0.7 (0.1)           | 96                | 0.6 (0.2)           | 94              | 0.1 (0.2)           | 0.6 (0.1to1.2)                                                | 0.3577         | 0.5 (-0.2to1.1)        | 0.0912         | 0.1 (-0.4to0.7)        | 0.4927         |
| <b>Control community</b>      |               |                     |                   |                     |                 |                     |                                                               |                |                        |                |                        |                |
| FEV <sub>1</sub> (ml/yr)      | 232           | 40(5)               | 72                | 55(8)               | 127             | 63(6)               | 23(7to38)                                                     | 0.5132         | 7(-13to28)             | 0.4649         | 15(-4to34)             | 0.9386         |
| FEV <sub>1</sub> (pred%/yr)   | 232           | 0.9(0.2)            | 72                | 1.5(0.4)            | 127             | 1.5(0.3)            | 0.6(-0.2to1.4)                                                | 0.7011         | 0.0(-1.0to1.1)         | 0.9973         | 0.6(-0.4to1.6)         | 0.7323         |
| FEV <sub>1</sub> /FVC (%/yr)  | 232           | 0.3 (0.1)           | 72                | 0.2 (0.3)           | 127             | 0.6 (0.2)           | 0.3 (-0.2to0.8)                                               | 0.7540         | 0.4 (-0.3to1.1)        | 0.3923         | -0.1 (-0.7to0.5)       | 0.6189         |

\* Unadjusted mean (SE) of the rate of FEV<sub>1</sub> and FEV<sub>1</sub>/FVC decline.

† Unadjusted difference (95% CI) between various smoking statuses in the rate of FEV<sub>1</sub> and FEV<sub>1</sub>/FVC decline was given.

‡ P values of comparison of difference between various smoking statuses in the rate of FEV<sub>1</sub> and FEV<sub>1</sub>/FVC decline were given after adjustment for confounders (i.e. baseline FEV<sub>1</sub>(or FEV<sub>1</sub>/FVC), age, gender, education, COPD, BMI, and occupational exposure to dust/gases/fumes, and change of environmental tobacco smoke) and clustering effects.

**Table D** Adjusted Annual Rate of Decline in FEV<sub>1</sub> (ml/yr, pred%/yr) and FEV<sub>1</sub>/FVC (%/yr) in Nonsmokers (age ≥ 40 yrs)

|                             | Two Communities |                    |     |                    |                        |                | Environmental Tobacco Smoke |                    |                   |                    |                        |                |
|-----------------------------|-----------------|--------------------|-----|--------------------|------------------------|----------------|-----------------------------|--------------------|-------------------|--------------------|------------------------|----------------|
|                             | IC              |                    | CC  |                    | Difference (CC VS. IC) |                | Improvement (No)            |                    | Improvement (Yes) |                    | Difference (No vs Yes) |                |
|                             | n               | M(SE) <sup>†</sup> | n   | M(SE) <sup>†</sup> | M(95%CI) <sup>†</sup>  | P <sup>‡</sup> | n                           | M(SE) <sup>†</sup> | n                 | M(SE) <sup>†</sup> | M(95%CI) <sup>†</sup>  | P <sup>§</sup> |
| FEV <sub>1</sub> (ml/yr)    | 312             | 19(4)              | 295 | 42(4)              | 23(12to33)             | 0.0445         | 264                         | 35(4)              | 343               | 26(4)              | 9(-2to19)              | 0.0759         |
| FEV <sub>1</sub> (pred%/yr) | 312             | -0.3(0.2)          | 295 | 1.0(0.2)           | 1.2(0.7to1.8)          | 0.0387         | 264                         | 0.7(0.2)           | 343               | 0.1(0.2)           | 0.6(0.0to1.2)          | 0.0440         |
| FEV <sub>1</sub> /FVC(%/yr) | 312             | -0.8 (0.1)         | 295 | 0.3 (0.1)          | 1.0(0.7to1.4)          | 0.0345         | 264                         | 0.2 (0.1)          | 343               | 0.4 (0.1)          | 0.2(-0.1to0.6)         | 0.0645         |

IC: intervention community, CC: control community.

\* Unadjusted mean (SE) of decline in FEV<sub>1</sub>.

† Unadjusted difference (95% CI) in the rate of FEV<sub>1</sub> decline was given.

‡ P values of comparison of difference in the rate of FEV<sub>1</sub> and FEV<sub>1</sub>/FVC decline were given after adjustment for confounders (i.e. baseline FEV<sub>1</sub> (or FEV<sub>1</sub>/FVC), age, gender, education, COPD, BMI, occupational exposure to dust/gases/fumes, and change of environmental tobacco smoke) and clustering effects.

§ P values of comparison of difference in the rate of FEV<sub>1</sub> and FEV<sub>1</sub>/FVC decline were given after adjustment for confounders (i.e. baseline FEV<sub>1</sub> (or FEV<sub>1</sub>/FVC), age, gender, education, COPD, BMI, communities and occupational exposure to dust/gases/fumes) and clustering effects.

**Table E** Correlation of Mean Air-Pollution Levels (log-transformed) during the Period from Baseline to the Spirometry Testing and Adjusted mean of FEV<sub>1</sub> at Each Year Across the Two Communities\*.

|                                        | SO <sub>2</sub> | NO <sub>2</sub> | Dusty disposition | Sulphation rate | Factor score <sup>‡</sup> |
|----------------------------------------|-----------------|-----------------|-------------------|-----------------|---------------------------|
| Total population                       |                 |                 |                   |                 |                           |
| FEV <sub>1</sub> (ml) <sup>†</sup>     | -0.741(0.0353)  | 0.163(0.7004)   | -0.870(0.0050)    | -0.610(0.1086)  | -0.772(0.0247)            |
| FEV <sub>1</sub> (pred) <sup>†</sup>   | -0.732(0.0391)  | 0.121(0.7750)   | -0.850(0.0075)    | -0.567(0.1425)  | -0.751(0.0316)            |
| FEV <sub>1</sub> /FVC (%) <sup>†</sup> | -0.902 (0.0020) | 0.075 (0.8600)  | -0.868 (0.0050)   | -0.604 (0.1130) | -0.832 (0.0100)           |
| Non COPD                               |                 |                 |                   |                 |                           |
| FEV <sub>1</sub> (ml) <sup>†</sup>     | -0.757(0.0297)  | 0.229(0.5846)   | -0.886(0.0034)    | -0.634(0.0911)  | -0.778(0.0231)            |
| FEV <sub>1</sub> (pred) <sup>†</sup>   | -0.79(0.0197)   | 0.189(0.6540)   | -0.891(0.0030)    | -0.62(0.1013)   | -0.791(0.0195)            |
| FEV <sub>1</sub> /FVC (%) <sup>†</sup> | -0.858 (0.0060) | 0.191 (0.6510)  | -0.767 (0.0260)   | -0.553 (0.1550) | -0.728 (0.0400)           |
| Never smokers                          |                 |                 |                   |                 |                           |
| FEV <sub>1</sub> (ml) <sup>†</sup>     | -0.764(0.0273)  | 0.265(0.5259)   | -0.883(0.0036)    | -0.651(0.0804)  | -0.778(0.0230)            |
| FEV <sub>1</sub> (pred) <sup>†</sup>   | -0.727(0.0412)  | 0.298(0.4734)   | -0.82(0.0127)     | -0.592(0.1223)  | -0.706(0.0500)            |
| FEV <sub>1</sub> /FVC (%) <sup>†</sup> | -0.473 (0.0060) | 0.022 (0.7250)  | -0.684 (<0.0001)  | -0.402 (0.0020) | -0.567 (0.143)            |

\* Data were given as **R (P)**. All data of air pollutants were analysis based on log-transformed values.

† adjusted mean of FEV<sub>1</sub> and FEV<sub>1</sub>/FVC for confounders (i.e. baseline FEV<sub>1</sub> (or FEV<sub>1</sub>/FVC), age, gender, education, COPD, BMI, occupational exposure to dust/gases/fumes, change of smoking status and change of environmental tobacco smoke) and clustering effects.

‡ Factor score that represented for total air pollution are extracted from level of SO<sub>2</sub> NO<sub>2</sub> Dusty disposition and Sulphation rate using factor analysis.

**Table F** The Adjusted Rate of Decline in FEV<sub>1</sub> (ml/yr, pred%/yr) and FEV<sub>1</sub>/FVC (%/yr) by Various Confounders\*

| Variable                                   | Subjects (n) | FEV <sub>1</sub> (ml) |        | FEV <sub>1</sub> (% pred.) |        | FEV <sub>1</sub> /FVC (%) |        |
|--------------------------------------------|--------------|-----------------------|--------|----------------------------|--------|---------------------------|--------|
|                                            |              | Difference            | P      | Difference                 | P      | Difference                | P      |
| sex                                        |              |                       |        |                            |        |                           |        |
| Male                                       | 392          | 19 ( 9 to 30)         | 0.0004 | 0.4(-0.2to1.0)             | 0.1519 | 0.4(0.1to0.8)             | 0.0190 |
| Female                                     | 468          | 0 (Reference)         |        | 0 (Reference)              |        | 0 (Reference)             |        |
| COPD at baseline                           |              |                       |        |                            |        |                           |        |
| Yes                                        | 99           | 10(-2 to 22)          | 0.1176 | 0.8(0.2to 1.5)             | 0.0112 | -0.2(-0.6to 0.2)          | 0.3804 |
| No                                         | 761          | 0 (Reference)         |        | 0 (Reference)              |        | 0 (Reference)             |        |
| Age groups at baseline                     |              |                       |        |                            |        |                           |        |
| 40-49yr                                    | 203          | 8(-4to 21)            | 0.2022 | 0.0(-0.7to 0.7)            | 0.9859 | 0.1(-0.3to 0.5)           | 0.5570 |
| 50-59yr                                    | 186          | -1(-13 to 10)         | 0.8200 | -0.3(-0.9 to 0.3)          | 0.3257 | -0.1(-0.5to 0.3)          | 0.7102 |
| 60-69yr                                    | 209          | -1 ( -11 to 9)        | 0.8442 | -0.4(-0.0to 0.2)           | 0.1960 | -0.2(-0.5to 0.2)          | 0.3818 |
| 70+yr                                      | 202          | 0 (Reference)         |        | 0 (Reference)              |        | 0 (Reference)             |        |
| Occupational exposure to dusty at baseline |              |                       |        |                            |        |                           |        |
| No                                         | 463          | -4( -11 to 4)         | 0.3535 | 0.0(-0.4to 0.4)            | 0.8576 | 0.0(-0.2to 0.3)           | 0.9462 |
| Yes                                        | 397          | 0 (Reference)         |        | 0 (Reference)              |        | 0 (Reference)             |        |
| Environmental tobacco smoke at baseline    |              |                       |        |                            |        |                           |        |
| Yes                                        | 617          | 3( -6 to 11)          | 0.5263 | 0.1(-0.3to 0.6)            | 0.5316 | 0.1(-0.2to 0.3)           | 0.6647 |
| No                                         | 243          | 0 (Reference)         |        | 0 (Reference)              |        | 0 (Reference)             |        |
| BMI at baseline (kg/m2)                    |              |                       |        |                            |        |                           |        |
| ≥ 18.5                                     | 778          | -4( -17 to 9)         | 0.5241 | -0.3(-1.0to 0.4)           | 0.4041 | -0.3(-0.7to 0.2)          | 0.2315 |
| <18.5                                      | 72           | 0 (Reference)         |        | 0 (Reference)              |        | 0 (Reference)             |        |
| Education years at baseline                |              |                       |        |                            |        |                           |        |
| < 6 yr                                     | 389          | 4 ( -6 to 14)         | 0.4306 | 0.2(-0.4to 0.7)            | 0.4937 | -0.2(-0.5to 0.2)          | 0.3346 |
| 6-12 yr                                    | 215          | 2( -8 to 13)          | 0.6410 | 0.1(-0.4to 0.6)            | 0.7103 | 0.0(-0.4to 0.3)           | 0.8666 |
| 12+yr                                      | 256          | 0 (Reference)         |        | 0 (Reference)              |        | 0 (Reference)             |        |
| Smoking status at baseline                 |              |                       |        |                            |        |                           |        |
| No-smoking                                 | 471          | -21( -33 to -10)      | 0.0003 | -1.0(-1.6to -0.4)          | 0.0007 | -0.2(-0.6to 0.2)          | 0.2935 |
| Formal smoking                             | 136          | -20 (-329 to -9)      | 0.0007 | -0.8(-1.4to -0.2)          | 0.0137 | -0.6(-1.0 to -0.2)        | 0.0040 |
| Current smoking                            | 253          | 0 (Reference)         |        | 0 (Reference)              |        | 0 (Reference)             |        |

\* all difference and P values was adjustment for clustering and confounding factors (i.e. baseline FEV<sub>1</sub>(FEV<sub>1</sub>/FVC), communities, age, gender, education, smoking status, environmental tobacco smoke, COPD, BMI, and occupational exposure to dust/gases/fumes).
